# Supplementary material for: Cross-Reactive Results in Serological Tests for Borreliosis in Patients with Active Viral Infections
Source: MDPI journal article supplement (doi:10.3390/pathogens11020203), 2022-02-03
Supplement: s1 [file s1]

**Table S1.** Detailed summary of results on determination of anti-*Borrelia* IgM and IgG antibodies obtained in serological tests in patients infected with the Epstein-Barr virus (EBV).

| No. of patient | EBV qPCR<br>(copies/mL) | Anti-EBV xMap Luminex<br>(AU/mL) |         |         |         | Anti-Borrelia IIFT<br>(titre) |       | Anti-Borrelia ELISA<br>(RU/ml) |        | Anti-Borrelia EUROLINE RN-AT IB - IgM |                   |              |          |          |          |           |        |          |          | Anti-Borrelia EUROLINE RN-AT IB - IgG |           |           |         |                   |              |          |               |               |               |               |               |        |     |
|----------------|-------------------------|----------------------------------|---------|---------|---------|-------------------------------|-------|--------------------------------|--------|---------------------------------------|-------------------|--------------|----------|----------|----------|-----------|--------|----------|----------|---------------------------------------|-----------|-----------|---------|-------------------|--------------|----------|---------------|---------------|---------------|---------------|---------------|--------|-----|
|                |                         | IgM VCA                          | IgG EAD | IgG VCA | IgG NA1 | IgM                           | IgG   | IgM                            | IgG    | VlsE B.b                              | p41 Flagellin B.a | p39 BmpA B.a | OspC B.a | OspC B.b | OspC B.g | OspC B.sp | Result | VlsE B.a | VlsE B.b | VlsE B.g                              | Lipid B.a | Lipid B.b | p83 B.a | p41 Flagellin B.g | p39 BmpA B.g | OspC B.g | p58 (BB_A 34) | p21 (BB_K 53) | P20 (BB_Q 03) | p19 (BB_N 38) | p18 (BB_P 38) | Result |     |
|                |                         |                                  |         |         |         |                               |       |                                |        |                                       |                   |              |          |          |          |           |        |          |          |                                       |           |           |         |                   |              |          |               |               |               |               |               |        |     |
| 1.             | 17,568                  | 5                                | 10247   | 4006    | 3       | -                             | 1:100 | 5.073                          | 18.248 | -                                     | -                 | -            | -        | -        | -        | -         | NEG    | -        | -        | -                                     | -         | -         | -       | -                 | -            | -        | -             | -             | -             | -             | -             | -      | NEG |
| 2.             | 2,367,893               | 1098                             | 93      | 1760    | 43      | 1:10                          | -     | 5.097                          | 8.810  | -                                     | +                 | -            | (+)      | +        | +        | -         | POS    | -        | -        | -                                     | -         | -         | -       | -                 | -            | (+)      | -             | -             | -             | -             | -             | -      | NEG |
| 3.             | 27,690                  | 33                               | 400     | 3371    | 514     | -                             | 1:100 | 5.508                          | 68.595 | -                                     | (+)               | -            | -        | -        | -        | -         | NEG    | -        | -        | -                                     | -         | -         | -       | -                 | -            | -        | -             | -             | -             | -             | -             | -      | NEG |
| 4.             | 17,800,568              | 1075                             | 24      | 1493    | 15      | 1:10                          | -     | 17.315                         | 5.982  | -                                     | -                 | -            | -        | -        | -        | -         | NEG    | -        | -        | -                                     | -         | -         | -       | -                 | -            | -        | -             | -             | -             | -             | -             | -      | NEG |
| 5.             | 134,534                 | 28                               | 235     | 560     | 222     | 1:10                          | -     | 24.115                         | 8.571  | -                                     | -                 | -            | -        | -        | -        | -         | NEG    | -        | -        | -                                     | -         | -         | -       | -                 | -            | -        | -             | -             | -             | -             | -             | -      | NEG |
| 6.             | 4,235                   | 51                               | 167     | 3880    | 325     | -                             | 1:100 | 5.097                          | 0.188  | -                                     | -                 | -            | -        | -        | -        | -         | NEG    | -        | -        | -                                     | -         | -         | -       | -                 | -            | -        | -             | -             | -             | -             | -             | -      | NEG |
| 7.             | 1,003,456               | 18                               | 120     | 2333    | 498     | -                             | 1:100 | 6.185                          | 10.522 | -                                     | -                 | -            | -        | -        | -        | -         | NEG    | -        | -        | -                                     | -         | -         | -       | -                 | -            | -        | -             | -             | -             | -             | -             | -      | NEG |
| 8.             | 5,467                   | 40                               | 154     | 2669    | 487     | -                             | -     | 12.597                         | 4.987  | -                                     | -                 | -            | -        | -        | -        | -         | NEG    | -        | -        | -                                     | -         | -         | -       | +                 | -            | -        | -             | -             | -             | -             | -             | -      | NEG |
| 9.             | 75,430                  | 52                               | 390     | 2853    | 446     | -                             | -     | 8.218                          | 4.350  | -                                     | -                 | -            | -        | -        | -        | -         | NEG    | -        | -        | -                                     | -         | -         | +       | (+)               | +            | +        | -             | -             | -             | -             | -             | -      | POS |
| 10.            | 1,342                   | 47                               | 385     | 3481    | 1205    | 1:10                          | -     | 186.688                        | 6.022  | -                                     | +                 | -            | (+)      | -        | +        | -         | POS    | -        | -        | -                                     | -         | -         | -       | -                 | -            | -        | -             | -             | -             | -             | -             | -      | NEG |
| 11.            | 3,567,893               | 13                               | 530     | 1541    | 457     | -                             | 1:100 | 3.016                          | 16.535 | -                                     | -                 | -            | -        | -        | -        | -         | NEG    | -        | -        | -                                     | -         | -         | -       | -                 | -            | -        | -             | -             | -             | -             | -             | -      | NEG |
| 12.            | 2,534                   | 190                              | 58      | 3475    | 33      | 1:10                          | 1:320 | 4.976                          | 9.168  | -                                     | -                 | -            | -        | -        | -        | -         | NEG    | -        | -        | -                                     | -         | -         | -       | -                 | -            | -        | -             | -             | -             | -             | -             | -      | NEG |
| 13.            | 74,538                  | 188                              | 176     | 4328    | 592     | 1:10                          | 1:100 | 1.636                          | 4.549  | -                                     | -                 | -            | -        | -        | -        | -         | NEG    | -        | -        | -                                     | -         | -         | -       | -                 | -            | -        | -             | -             | -             | -             | -             | -      | NEG |
| 14.            | 15,379                  | 460                              | (107)   | 3654    | 42      | 1:10                          | -     | 1.927                          | 4.190  | -                                     | +                 | -            | -        | -        | -        | -         | NEG    | -        | -        | -                                     | -         | -         | -       | (+)               | +            | -        | -             | -             | -             | -             | -             | -      | NEG |
| 15.            | 7,980                   | 21                               | 284     | 3071    | 1399    | 1:10                          | -     | 10.806                         | 7.615  | -                                     | -                 | -            | -        | -        | -        | -         | NEG    | -        | -        | -                                     | -         | -         | -       | -                 | -            | -        | -             | -             | -             | -             | -             | -      | NEG |
| 16.            | 1,238                   | 40                               | 213     | 4378    | 1070    | 1:10                          | 1:100 | 38.476                         | 5.106  | -                                     | -                 | -            | -        | -        | -        | -         | NEG    | -        | -        | -                                     | -         | -         | -       | -                 | -            | -        | -             | -             | -             | -             | -             | -      | NEG |
| 17.            | 178,903                 | 19                               | 354     | 4606    | 1930    | -                             | -     | 12.040                         | 12.553 | -                                     | +                 | -            | -        | -        | -        | -         | NEG    | -        | -        | -                                     | -         | -         | -       | -                 | -            | -        | -             | -             | -             | -             | -             | -      | NEG |
| 18.            | 1,212,346               | 916                              | 29      | 1234    | 16      | 1:10                          | 1:100 | 5.484                          | 45.297 | -                                     | -                 | -            | -        | -        | -        | -         | NEG    | -        | -        | -                                     | -         | -         | -       | +                 | -            | -        | -             | -             | -             | -             | -             | -      | NEG |
| 19.            | 5,430,987               | 195                              | 36      | 253     | 37      | 1:10                          | -     | 134.487                        | 18.288 | -                                     | -                 | -            | -        | -        | -        | -         | NEG    | -        | -        | -                                     | -         | -         | (+)     | +                 | (+)          | -        | -             | -             | -             | -             | -             | -      | NEG |
| 20.            | 560                     | 919                              | 65      | 2565    | 40      | 1:10                          | 1:320 | 7.298                          | 8.173  | -                                     | +                 | -            | -        | -        | -        | -         | NEG    | -        | -        | -                                     | -         | -         | -       | +                 | -            | -        | -             | -             | -             | -             | -             | -      | NEG |
| 21.            | 29,834                  | 99                               | 323     | 3335    | 1133    | 1:10                          | 1:100 | 1.600                          | 17.093 | -                                     | -                 | -            | -        | -        | -        | -         | NEG    | -        | -        | -                                     | -         | -         | -       | -                 | -            | (+)      | -             | -             | -             | -             | -             | -      | NEG |
| 22.            | 3,854                   | 713                              | 213     | 5108    | 209     | 1:10                          | 1:100 | 2.435                          | 17.929 | -                                     | -                 | -            | -        | -        | (+)      | -         | BOR    | -        | -        | -                                     | -         | -         | -       | (+)               | -            | -        | -             | -             | -             | -             | -             | -      | NEG |
| 23.            | 17,345                  | 983                              | 46      | 2339    | 12      | -                             | 1:100 | 13.565                         | 18.009 | -                                     | -                 | -            | -        | -        | -        | -         | NEG    | -        | -        | -                                     | -         | -         | -       | -                 | +            | -        | -             | +             | -             | -             | -             | -      | POS |
| 24.            | 67,389                  | 680                              | 34      | 2919    | 62      | -                             | 1:320 | 19.008                         | 9.088  | -                                     | -                 | -            | -        | -        | -        | -         | NEG    | -        | -        | -                                     | -         | -         | -       | +                 | (+)          | (+)      | -             | -             | -             | -             | -             | -      | NEG |
| 25.            | 5,943                   | 514                              | 40      | 3029    | 64      | -                             | 1:100 | 4.976                          | 5.027  | -                                     | -                 | -            | -        | -        | -        | -         | NEG    | -        | -        | -                                     | -         | -         | -       | +                 | -            | -        | -             | -             | -             | -             | -             | -      | NEG |
| 26.            | 95,782                  | 21                               | (115)   | 1746    | 203     | -                             | 1:100 | 4.250                          | 9.168  | -                                     | +                 | -            | -        | -        | -        | -         | NEG    | -        | -        | -                                     | -         | -         | -       | -                 | -            | -        | -             | -             | -             | -             | -             | -      | NEG |
| 27.            | 3,945                   | 12                               | 90      | 2802    | 1188    | -                             | 1:100 | 10.831                         | 12.673 | -                                     | +                 | -            | -        | -        | -        | -         | NEG    | -        | -        | -                                     | -         | -         | (+)     | +                 | -            | -        | -             | -             | -             | -             | -             | -      | NEG |

**Legend:**

qPCR - quantitative polymerase chain reaction

Anti-EBV xMap Luminex: <100 AU/mL - negative result, 100 - 120 AU/mL - borderline result, ≥120 AU/mL - positive result.

Anti-*Borrelia* indirect immunofluorescence test (IIFT): IgM ≥1:10 titer - positive result; IgG ≥1:100 titer - positive result.

Anti-*Borrelia* enzyme-linked immunosorbent assay (ELISA): Ratio <16 RU/mL - negative result, 16 - 22 RU/mL - borderline result, ≥22 RU/mL - positive result.

Anti-*Borrelia* EUROLINE RN-AT immunoblot (IB): „-“ negative result, „(+)“ – borderline result, „+“ positive result.

Positive results are marked in bold and borderline ones are additionally marked in parentheses.

B.a — *Borrelia afzelii*, B.b — *Borrelia burgdorferi*, B.g — *Borrelia garinii*, B.sp — *Borrelia spielmanii*.

**Table S2.** Detailed summary of results on determination of anti-*Borrelia* IgM and IgG antibodies obtained in serological tests in patients infected with cytomegalovirus (CMV).

| No. of patient | CMV qPCR<br>(copies/mL) | Anti-CMV ELISA<br>(RU/mL) |        | Anti-Borrelia IIFT<br>(titre) |       | Anti-Borrelia ELISA<br>(RU/ml) |        | Anti-Borrelia EUROLINE RN-AT IB - IgM |                   |              |          |          |          |           |        | Anti-Borrelia EUROLINE RN-AT IB - IgG |          |          |           |           |         |                   |              |          |               |               |               |               |               |        |     |
|----------------|-------------------------|---------------------------|--------|-------------------------------|-------|--------------------------------|--------|---------------------------------------|-------------------|--------------|----------|----------|----------|-----------|--------|---------------------------------------|----------|----------|-----------|-----------|---------|-------------------|--------------|----------|---------------|---------------|---------------|---------------|---------------|--------|-----|
|                |                         | IgM                       | IgG    | IgM                           | IgG   | IgM                            | IgG    | VlsE B.b                              | p41 Flagellin B.a | p39 BmpA B.a | OspC B.a | OspC B.b | OspC B.g | OspC B.sp | Result | VlsE B.a                              | VlsE B.b | VlsE B.g | Lipid B.a | Lipid B.b | p83 B.a | p41 Flagellin B.g | p39 BmpA B.g | OspC B.g | p58 (BB_A 34) | p21 (BB_K 53) | P20 (BB_Q 03) | p19 (BB_N 38) | p18 (BB_P 38) | Result |     |
|                |                         |                           |        |                               |       |                                |        |                                       |                   |              |          |          |          |           |        |                                       |          |          |           |           |         |                   |              |          |               |               |               |               |               |        |     |
| 1.             | 7,160                   | 1.3                       | 34.45  | 1:10                          | -     | 2.677                          | 1.250  | -                                     | -                 | -            | +        | +        | +        | -         | POS    | -                                     | -        | -        | -         | -         | -       | -                 | -            | -        | -             | -             | -             | -             | -             | -      | NEG |
| 2.             | 121,822                 | 6.6                       | >200   | -                             | -     | 0.545                          | 3.115  | -                                     | -                 | -            | -        | -        | (+)      | -         | BOR    | -                                     | -        | -        | -         | -         | -       | (+)               | -            | +        | -             | -             | -             | -             | -             | -      | BOR |
| 3.             | 18,684                  | 2.1                       | 85.34  | -                             | -     | 12.766                         | 0.625  | -                                     | -                 | -            | -        | -        | (+)      | -         | BOR    | -                                     | -        | -        | -         | -         | -       | -                 | -            | -        | -             | -             | -             | -             | -             | -      | NEG |
| 4.             | 3,160                   | 1.1                       | 53.78  | -                             | -     | 3.210                          | 3.075  | -                                     | +                 | -            | -        | -        | -        | -         | NEG    | -                                     | -        | -        | -         | -         | -       | -                 | (+)          | -        | -             | -             | -             | -             | -             | -      | NEG |
| 5.             | 1,600                   | 0.6                       | 48.01  | -                             | 1:100 | 0.364                          | 6.858  | -                                     | +                 | -            | (+)      | -        | (+)      | -         | BOR    | -                                     | -        | -        | -         | -         | -       | +                 | -            | -        | -             | -             | -             | -             | -             | -      | NEG |
| 6.             | 3,040                   | 1.0                       | 32.80  | -                             | -     | 1.636                          | 3.314  | -                                     | -                 | -            | -        | -        | -        | -         | NEG    | -                                     | -        | -        | -         | -         | -       | -                 | -            | -        | -             | -             | -             | -             | -             | -      | NEG |
| 7.             | 51,000                  | 4.1                       | 93.87  | -                             | -     | 1.055                          | 8.252  | -                                     | -                 | -            | -        | -        | -        | -         | NEG    | -                                     | -        | -        | -         | -         | -       | -                 | -            | -        | -             | -             | -             | -             | -             | -      | NEG |
| 8.             | 1,937,095               | 5.4                       | >200   | 1:10                          | -     | 6.258                          | 2.478  | -                                     | +                 | -            | -        | -        | -        | -         | NEG    | -                                     | -        | -        | -         | -         | -       | -                 | -            | -        | -             | -             | -             | -             | -             | -      | NEG |
| 9.             | 1,078                   | 0.2                       | 27.96  | -                             | -     | 215.17                         | 0.969  | -                                     | -                 | -            | +        | +        | +        | +         | POS    | -                                     | -        | -        | -         | -         | -       | -                 | +            | -        | -             | -             | -             | -             | -             | -      | BOR |
| 10.            | 51,842                  | 3.9                       | 22.16  | -                             | -     | 1.200                          | 1.219  | -                                     | -                 | -            | -        | -        | -        | -         | NEG    | -                                     | -        | -        | -         | -         | -       | -                 | -            | -        | -             | -             | -             | -             | -             | -      | NEG |
| 11.            | 3,675,025               | 3.3                       | >200   | -                             | -     | 2.605                          | 4.628  | -                                     | -                 | -            | -        | -        | -        | -         | NEG    | -                                     | -        | -        | -         | -         | -       | +                 | -            | -        | -             | -             | -             | -             | -             | -      | NEG |
| 12.            | 403,169                 | 5.7                       | 21.91  | -                             | -     | 1.018                          | 0.656  | -                                     | -                 | -            | -        | -        | -        | -         | NEG    | -                                     | -        | -        | -         | -         | -       | (+)               | -            | -        | -             | -             | -             | -             | -             | -      | NEG |
| 13.            | 2,900                   | 0.3                       | 86.23  | -                             | -     | 0.836                          | 4.628  | -                                     | -                 | -            | -        | -        | -        | -         | NEG    | -                                     | -        | -        | -         | -         | -       | +                 | -            | -        | -             | -             | -             | -             | -             | -      | NEG |
| 14.            | 1,193                   | 0.7                       | 34.56  | -                             | -     | 2.048                          | 20.154 | -                                     | -                 | -            | -        | -        | -        | (+)       | NEG    | -                                     | +        | +        | -         | -         | -       | +                 | -            | +        | -             | -             | -             | -             | -             | -      | POS |
| 15.            | 617,577                 | 8.1                       | 132.23 | -                             | -     | 1.382                          | 1.719  | -                                     | -                 | -            | -        | -        | -        | -         | NEG    | -                                     | -        | -        | -         | -         | -       | -                 | -            | -        | -             | -             | -             | -             | -             | -      | NEG |
| 16.            | 5,126                   | 1.2                       | 28.56  | -                             | -     | 1.018                          | 2.040  | -                                     | -                 | -            | -        | -        | -        | -         | NEG    | -                                     | -        | -        | -         | -         | -       | -                 | -            | -        | -             | -             | -             | -             | -             | -      | NEG |
| 17.            | 7,700                   | 1.3                       | 27.54  | -                             | 1:100 | 2.484                          | 1.875  | -                                     | -                 | -            | -        | -        | -        | -         | NEG    | -                                     | -        | -        | -         | -         | -       | (+)               | -            | (+)      | -             | -             | -             | -             | -             | -      | NEG |
| 18.            | 97,687                  | 4.5                       | 118.36 | -                             | 1:100 | 0.618                          | 7.257  | -                                     | -                 | -            | -        | -        | -        | -         | NEG    | -                                     | -        | -        | -         | -         | -       | +                 | -            | -        | -             | -             | -             | -             | -             | -      | NEG |
| 19.            | 32,219                  | 1.6                       | 95.05  | 1:10                          | -     | 111.41                         | 2.438  | -                                     | -                 | -            | -        | -        | (+)      | +         | POS    | -                                     | -        | -        | -         | -         | -       | +                 | -            | -        | -             | -             | -             | -             | -             | -      | NEG |
| 20.            | 15,625                  | 0.8                       | 74.03  | -                             | -     | 1.418                          | 4.827  | -                                     | -                 | -            | -        | -        | -        | -         | NEG    | -                                     | -        | -        | -         | -         | -       | -                 | -            | -        | -             | -             | -             | -             | -             | -      | NEG |
| 21.            | 69,770                  | 1.1                       | 59.36  | -                             | -     | 0.655                          | 1.500  | -                                     | -                 | -            | -        | -        | -        | -         | NEG    | -                                     | -        | -        | -         | -         | -       | -                 | -            | -        | -             | -             | -             | -             | -             | -      | NEG |
| 22.            | 28,330                  | 1.4                       | 35.62  | -                             | -     | 2.871                          | 0.344  | -                                     | -                 | -            | -        | -        | -        | -         | NEG    | -                                     | -        | -        | -         | -         | -       | -                 | -            | -        | -             | -             | -             | -             | -             | -      | NEG |
| 23.            | 1,505,279               | 2.3                       | 102.23 | -                             | 1:100 | 2.411                          | 4.708  | -                                     | -                 | -            | -        | -        | -        | -         | NEG    | -                                     | -        | -        | -         | -         | -       | +                 | -            | -        | -             | -             | -             | -             | -             | -      | NEG |
| 24.            | 85,093,861              | 4.3                       | 184.34 | 1:10                          | -     | 5.145                          | 3.155  | -                                     | -                 | -            | -        | -        | -        | -         | NEG    | -                                     | -        | -        | -         | -         | -       | -                 | -            | -        | -             | -             | -             | -             | -             | -      | NEG |
| 25.            | 13,114                  | 1.7                       | 47.06  | -                             | -     | 1.600                          | 5.425  | -                                     | -                 | -            | -        | -        | -        | -         | NEG    | -                                     | -        | -        | -         | -         | -       | +                 | -            | -        | -             | -             | -             | -             | -             | -      | NEG |
| 26.            | 44,900                  | 3.3                       | 25.21  | -                             | -     | 2.315                          | 1.844  | -                                     | -                 | -            | -        | -        | -        | -         | NEG    | -                                     | -        | -        | -         | -         | -       | -                 | -            | -        | -             | -             | -             | -             | -             | -      | NEG |

**Legend:**

qPCR - quantitative polymerase chain reaction

Anti-CMV IgM enzyme-linked immunosorbent assay (ELISA): Ratio <0.8 RU/mL - negative result, 0.8 - 1.1 RU/mL - borderline result, ≥1.1 RU/mL - positive result.

Anti-CMV IgG ELISA: Ratio <16 RU/mL - negative result, 16 - 22 RU/mL - borderline result, ≥22 RU/mL - positive result.

Anti-*Borrelia* indirect immunofluorescence test (IIFT): IgM ≥1:10 titer - positive result; IgG ≥1:100 titer - positive result.

Anti-*Borrelia* ELISA: Ratio <16 RU/mL - negative result, 16 - 22 RU/mL - borderline result, ≥22 RU/mL - positive result.

Anti-*Borrelia* EUROLINE RN-AT immunoblot (IB): „-“ negative result, „(+)“ – borderline result, „+“ positive result.

Positive results are marked in bold and borderline ones are additionally marked in parentheses.

B.a — *Borrelia afzelii*, B.b — *Borrelia burgdorferi*, B.g — *Borrelia garinii*, B.sp — *Borrelia spielmanii*.

**Table S3.** Detailed summary of results on determination of anti-*Borrelia* IgM and IgG antibodies obtained in serological tests in patients infected with the BK virus (BKV).

| No. of patient | BKV qPCR<br>(copies/mL) | Anti-Borrelia IIFT<br>(titre) |       | Anti-Borrelia ELISA<br>(RU/ml) |        | Anti-Borrelia EUROLINE RN-AT IB - IgM |                   |              |          |          |          |           |        | Anti-Borrelia EUROLINE RN-AT IB - IgG |          |          |           |           |         |                   |              |          |               |               |               | Result |               |               |
|----------------|-------------------------|-------------------------------|-------|--------------------------------|--------|---------------------------------------|-------------------|--------------|----------|----------|----------|-----------|--------|---------------------------------------|----------|----------|-----------|-----------|---------|-------------------|--------------|----------|---------------|---------------|---------------|--------|---------------|---------------|
|                |                         | IgM                           | IgG   | IgM                            | IgG    | VlsE B.b                              | p41 Flagellin B.a | p39 BmpA B.a | OspC B.a | OspC B.b | OspC B.g | OspC B.sp | Result | VlsE B.a                              | VlsE B.b | VlsE B.g | Lipid B.a | Lipid B.b | p83 B.a | p41 Flagellin B.g | p39 BmpA B.g | OspC B.g | p58 (BB_A 34) | p21 (BB_K 53) | P20 (BB_Q 03) |        | p19 (BB_N 38) | p18 (BB_P 38) |
|                |                         |                               |       |                                |        |                                       |                   |              |          |          |          |           |        |                                       |          |          |           |           |         |                   |              |          |               |               |               |        |               |               |
| 1.             | 843,021                 | -                             | -     | 0.618                          | 3.872  | -                                     | -                 | -            | -        | -        | -        | -         | NEG    | -                                     | -        | -        | -         | -         | -       | +                 | -            | -        | -             | -             | -             | -      | -             | NEG           |
| 2.             | 12,170                  | -                             | -     | 0.836                          | 2.080  | -                                     | -                 | -            | -        | -        | -        | -         | NEG    | -                                     | -        | -        | -         | -         | -       | +                 | -            | -        | -             | -             | -             | -      | -             | NEG           |
| 3.             | 8,200                   | -                             | -     | 2.823                          | 4.190  | -                                     | -                 | -            | -        | -        | -        | -         | NEG    | -                                     | -        | -        | -         | -         | -       | +                 | -            | -        | -             | -             | -             | -      | -             | NEG           |
| 4.             | 15,802                  | 1:10                          | -     | 212.34                         | 50.833 | -                                     | +                 | -            | (+)      | -        | +        | +         | POS    | -                                     | (+)      | (+)      | -         | -         | -       | +                 | -            | +        | -             | -             | -             | -      | -             | POS           |
| 5.             | 1,299                   | -                             | -     | 6.403                          | 5.544  | -                                     | -                 | -            | -        | -        | -        | (+)       | NEG    | -                                     | -        | +        | -         | -         | -       | +                 | -            | -        | -             | -             | -             | -      | -             | BOR           |
| 6.             | 8,802                   | -                             | 1:100 | 2.750                          | 6.022  | -                                     | -                 | -            | +        | +        | -        | -         | POS    | -                                     | -        | -        | -         | -         | -       | +                 | -            | -        | -             | -             | -             | -      | -             | NEG           |
| 7.             | 920                     | -                             | -     | 0.655                          | 0.625  | -                                     | -                 | -            | -        | -        | -        | -         | NEG    | -                                     | -        | -        | -         | -         | -       | +                 | -            | +        | -             | -             | -             | -      | -             | NEG           |
| 8.             | 19,000                  | 1:10                          | -     | 2.677                          | 7.456  | -                                     | -                 | -            | -        | -        | -        | -         | NEG    | -                                     | -        | -        | -         | -         | -       | +                 | -            | +        | -             | -             | -             | -      | -             | BOR           |
| 9.             | 8,930                   | -                             | -     | 0.327                          | 2.836  | -                                     | -                 | -            | -        | -        | -        | -         | NEG    | -                                     | -        | -        | -         | -         | -       | +                 | -            | -        | -             | -             | -             | -      | -             | NEG           |
| 10.            | 4,800                   | -                             | -     | 0.545                          | 1.063  | -                                     | -                 | -            | -        | -        | -        | -         | NEG    | -                                     | -        | -        | -         | -         | -       | +                 | -            | -        | -             | -             | -             | -      | -             | NEG           |
| 11.            | 16,718                  | 1:10                          | -     | 2.169                          | 2.717  | -                                     | -                 | -            | -        | -        | -        | -         | NEG    | -                                     | -        | -        | -         | -         | -       | +                 | -            | +        | -             | -             | -             | -      | -             | BOR           |
| 12.            | 16,000                  | -                             | -     | 0.821                          | 3.792  | -                                     | -                 | -            | -        | -        | -        | -         | NEG    | -                                     | (+)      | -        | -         | -         | -       | (+)               | -            | -        | -             | -             | -             | -      | -             | BOR           |
| 13.            | 3,100                   | 1:10                          | -     | 2.266                          | 1.906  | -                                     | -                 | -            | -        | -        | -        | -         | NEG    | -                                     | -        | -        | -         | -         | -       | -                 | +            | -        | +             | -             | -             | -      | -             | POS           |
| 14.            | 39,976,524              | -                             | -     | 7.105                          | 8.929  | -                                     | -                 | -            | (+)      | (+)      | +        | -         | POS    | -                                     | -        | (+)      | -         | -         | -       | +                 | -            | +        | -             | -             | -             | -      | -             | BOR           |
| 15.            | 174,384                 | -                             | -     | 1.782                          | 4.469  | -                                     | -                 | -            | -        | -        | -        | -         | NEG    | -                                     | -        | -        | -         | -         | -       | +                 | -            | -        | -             | -             | -             | -      | -             | NEG           |
| 16.            | 5,588                   | -                             | -     | 4.081                          | 6.022  | -                                     | (+)               | -            | -        | -        | +        | -         | POS    | -                                     | -        | -        | -         | -         | -       | +                 | +            | +        | -             | -             | -             | -      | -             | POS           |

**Legend:**

qPCR - quantitative polymerase chain reaction

Anti-*Borrelia* indirect immunofluorescence test (IIFT): IgM ≥1:10 titer - positive result; IgG ≥1:100 titer - positive result.

Anti-*Borrelia* enzyme-linked immunosorbent assay (ELISA): Ratio <16 RU/mL - negative result, 16 - 22 RU/mL - borderline result, ≥22 RU/mL - positive result.

Anti-*Borrelia* EUROLINE RN-AT immunoblot (IB): „-“ negative result, „(+)“ – borderline result, „+“ positive result.

Positive results are marked in bold and borderline ones are additionally marked in parentheses.

B.a — *Borrelia afzelii*, B.b — *Borrelia burgdorferi*, B.g — *Borrelia garinii*, B.sp — *Borrelia spielmanii*.

**Table S4.** Detailed summary of results on determination of anti-*Borrelia* IgM and IgG antibodies obtained in serological tests in healthy individuals.

| No. of patient | EBV<br>qPCR | CMV<br>qPCR | BKV<br>qPCR | Anti-EBV xMap<br>Luminex<br>(AU/ml) |         |         |         | Anti-<br>CMV<br>ELISA<br>(RU/ml) |      | Anti-<br><i>Borrelia</i><br>IIFT<br>(titre) |       | Anti- <i>Borrelia</i><br>ELISA<br>(RU/mL) |        | Anti- <i>Borrelia</i> EUROLINE RN-AT IB - IgM |                   |              |          |          |          |           |        |          |          | Anti- <i>Borrelia</i> EUROLINE RN-AT IB - IgG |           |           |         |                   |              |          |               |               |               |               |               |        |
|----------------|-------------|-------------|-------------|-------------------------------------|---------|---------|---------|----------------------------------|------|---------------------------------------------|-------|-------------------------------------------|--------|-----------------------------------------------|-------------------|--------------|----------|----------|----------|-----------|--------|----------|----------|-----------------------------------------------|-----------|-----------|---------|-------------------|--------------|----------|---------------|---------------|---------------|---------------|---------------|--------|
|                |             |             |             | IgM VCA                             | IgG EAD | IgG VCA | IgG NA1 | IgM                              | IgG  | IgM                                         | IgG   | IgM                                       | IgG    | VlsE B.b                                      | p41 Flagellin B.a | p39 BmpA B.a | OspC B.a | OspC B.b | OspC B.g | OspC B.sp | Result | VlsE B.a | VlsE B.b | VlsE B.g                                      | Lipid B.a | Lipid B.b | p83 B.a | p41 Flagellin B.g | p39 BmpA B.g | OspC B.g | p58 (BB_A 34) | p21 (BB_K 53) | P20 (BB_Q 03) | p19 (BB_N 38) | p18 (BB_P 38) | Result |
|                |             |             |             |                                     |         |         |         |                                  |      |                                             |       |                                           |        |                                               |                   |              |          |          |          |           |        |          |          |                                               |           |           |         |                   |              |          |               |               |               |               |               |        |
| (copies/mL)    |             |             |             |                                     |         |         |         |                                  |      |                                             |       |                                           |        |                                               |                   |              |          |          |          |           |        |          |          |                                               |           |           |         |                   |              |          |               |               |               |               |               |        |
| 1.             | 0           | 0           | 0           | 12                                  | 37      | 28      | 99      | 0.2                              | 3    | -                                           | -     | 5.173                                     | 1.438  | -                                             | -                 | -            | -        | -        | -        | -         | NEG    | -        | -        | -                                             | -         | -         | -       | -                 | -            | -        | -             | -             | -             | -             | -             | NEG    |
| 2.             | 0           | 0           | 0           | 45                                  | 5       | 46      | (105)   | 0.6                              | 45   | 1:10                                        | -     | 4.087                                     | 1.610  | -                                             | -                 | -            | -        | -        | -        | -         | NEG    | -        | -        | -                                             | -         | -         | -       | -                 | -            | -        | -             | -             | -             | -             | -             | NEG    |
| 3.             | 0           | 0           | 0           | 3                                   | 25      | 84      | 18      | 0,1                              | 68   | -                                           | -     | 5.408                                     | 3.295  | -                                             | (+)               | -            | -        | -        | -        | -         | NEG    | -        | -        | -                                             | -         | -         | -       | -                 | -            | -        | -             | -             | -             | -             | -             | NEG    |
| 4.             | 0           | 0           | 0           | 27                                  | 35      | 28      | 125     | 0.02                             | 2    | -                                           | -     | 7.315                                     | 5.982  | -                                             | -                 | -            | -        | -        | -        | -         | NEG    | -        | -        | -                                             | -         | -         | -       | -                 | -            | -        | -             | -             | -             | -             | -             | NEG    |
| 5.             | 0           | 0           | 0           | 51                                  | 16      | 65      | 159     | 0.23                             | 15   | -                                           | -     | 4.115                                     | 6.571  | -                                             | -                 | -            | -        | -        | -        | -         | NEG    | -        | -        | -                                             | -         | -         | -       | -                 | -            | -        | -             | -             | -             | -             | -             | NEG    |
| 6.             | 0           | 0           | 0           | 17                                  | 9       | 38      | 23      | 0.21                             | 7    | -                                           | 1:100 | 5.097                                     | 0.188  | -                                             | -                 | -            | -        | -        | -        | -         | NEG    | -        | -        | -                                             | -         | -         | -       | -                 | -            | -        | -             | -             | -             | -             | -             | NEG    |
| 7.             | 0           | 0           | 0           | 68                                  | 43      | (101)   | 56      | 0.17                             | 2    | -                                           | -     | 6.185                                     | 0.252  | -                                             | -                 | -            | -        | -        | -        | -         | NEG    | -        | -        | -                                             | -         | -         | -       | -                 | -            | -        | -             | -             | -             | -             | -             | NEG    |
| 8.             | 0           | 0           | 0           | 75                                  | 36      | 74      | 178     | 0,59                             | 8    | -                                           | -     | 2.897                                     | 4.627  | -                                             | -                 | -            | -        | -        | -        | -         | NEG    | -        | -        | -                                             | -         | -         | -       | -                 | -            | -        | -             | -             | -             | -             | -             | NEG    |
| 9.             | 0           | 0           | 0           | 57                                  | 7       | 12      | 9       | 0.32                             | 10   | -                                           | -     | 8.318                                     | 4.780  | -                                             | -                 | -            | -        | -        | -        | -         | NEG    | -        | -        | -                                             | -         | -         | -       | -                 | -            | -        | -             | -             | -             | -             | -             | NEG    |
| 10.            | 0           | 0           | 0           | 8                                   | 38      | 65      | 197     | 0.43                             | 23   | 1:10                                        | -     | 6.158                                     | 1.022  | -                                             | +                 | -            | -        | -        | -        | -         | NEG    | -        | -        | -                                             | -         | -         | -       | -                 | -            | -        | -             | -             | -             | -             | -             | NEG    |
| 11.            | 0           | 0           | 0           | 53                                  | 11      | 42      | 11      | 0.2                              | (16) | -                                           | -     | 10.123                                    | 12.040 | -                                             | -                 | -            | -        | -        | -        | -         | NEG    | -        | -        | -                                             | -         | -         | (+)     | -                 | -            | -        | -             | -             | -             | -             | -             | NEG    |
| 12.            | 0           | 0           | 0           | 42                                  | 19      | 59      | 65      | 0.32                             | 20   | -                                           | -     | 4.378                                     | 1.956  | -                                             | -                 | -            | -        | -        | -        | -         | NEG    | -        | -        | -                                             | -         | -         | -       | -                 | -            | -        | -             | -             | -             | -             | -             | NEG    |
| 13.            | 0           | 0           | 0           | 4                                   | 32      | 36      | 20      | 0.56                             | 12   | -                                           | -     | 8.743                                     | 13.230 | -                                             | -                 | -            | -        | -        | -        | -         | NEG    | -        | -        | -                                             | -         | -         | -       | -                 | -            | -        | -             | -             | -             | -             | -             | NEG    |
| 14.            | 0           | 0           | 0           | 27                                  | 45      | 74      | 47      | 0.11                             | 31   | -                                           | -     | 1.005                                     | 3.567  | -                                             | -                 | -            | -        | -        | -        | -         | NEG    | -        | -        | -                                             | -         | -         | -       | -                 | -            | -        | -             | -             | -             | -             | -             | NEG    |
| 15.            | 0           | 0           | 0           | 36                                  | 46      | 34      | 31      | 0.72                             | 4    | -                                           | -     | 2.634                                     | 9.401  | -                                             | -                 | -            | -        | -        | -        | -         | NEG    | -        | -        | -                                             | -         | -         | -       | -                 | -            | -        | -             | -             | -             | -             | -             | NEG    |
| 16.            | 0           | 0           | 0           | 12                                  | 63      | 56      | 42      | 0.17                             | 15   | -                                           | 1:100 | 7.835                                     | 16.012 | -                                             | (+)               | -            | -        | -        | -        | -         | NEG    | -        | -        | -                                             | -         | -         | -       | -                 | -            | -        | -             | -             | -             | -             | -             | NEG    |
| 17.            | 0           | 0           | 0           | 3                                   | 21      | 23      | 76      | 0.34                             | 10   | -                                           | -     | 14.123                                    | 10.319 | -                                             | -                 | -            | -        | -        | -        | -         | NEG    | -        | -        | -                                             | -         | -         | -       | -                 | -            | -        | -             | -             | -             | -             | -             | NEG    |
| 18.            | 0           | 0           | 0           | 56                                  | 27      | 2       | 35      | 0.55                             | 14   | -                                           | -     | 12.105                                    | 7.324  | -                                             | -                 | (+)          | -        | -        | -        | -         | NEG    | -        | -        | -                                             | -         | -         | -       | -                 | -            | -        | -             | -             | -             | -             | -             | NEG    |
| 19.            | 0           | 0           | 0           | 71                                  | 43      | 25      | 27      | 0.21                             | 14   | -                                           | -     | 9.543                                     | 4.290  | -                                             | -                 | -            | -        | -        | -        | -         | NEG    | -        | -        | -                                             | -         | -         | -       | -                 | -            | -        | -             | -             | -             | -             | -             | NEG    |
| 20.            | 0           | 0           | 0           | 23                                  | 29      | 39      | 43      | 0.34                             | 18   | -                                           | -     | 8.675                                     | 2.402  | -                                             | -                 | -            | -        | -        | -        | -         | NEG    | -        | -        | -                                             | -         | -         | -       | -                 | -            | -        | -             | -             | -             | -             | -             | NEG    |

**Legend:**

EBV - Epstein-Barr virus, CMV - cytomegalovirus, BKV - BK virus.

qPCR - quantitative polymerase chain reaction.

Anti-EBV xMap Luminex: <100 AU/mL - negative result, 100 - 120 AU/mL - borderline result, ≥120 AU/mL - positive result.

Anti-CMV IgM enzyme-linked immunosorbent assay (ELISA): Ratio <0.8 RU/mL - negative result, 0.8 - 1.1 RU/mL - borderline result, ≥1.1 RU/mL - positive result.

Anti-CMV IgG ELISA: Ratio <16 RU/ml - negative result, 16 - 22 RU/mL - borderline result, ≥22 RU/mL - positive result.

Anti-*Borrelia* indirect immunofluorescence test (IIFT): IgM ≥1:10 titer - positive result; IgG ≥1:100 titer - positive result.

Anti-*Borrelia* ELISA: Ratio <16 RU/mL - negative result, 16 - 22 RU/mL - borderline result, ≥22 RU/mL - positive result.

Anti-*Borrelia* EUROLINE RN-AT immunoblot (IB): „-“ - negative result, „(+)“ - borderline result, „+“ - positive result.

Positive results are marked in bold and borderline ones are additionally marked in parentheses.

B.a — *Borrelia afzelii*, B.b — *Borrelia burgdorferi*, B.g — *Borrelia garinii*, B.sp — *Borrelia spielmanii*.
